# Supplementary material
Source: publisher site journal article supplement (https://www.dovepress.com/article/227644)

**Supplementary Figure S1.** miR-939-5p targeted ARHGAP4 in SW1990 and PANC-1 cells. miR-3150a-3p, miR-939-5p and miR-762 levels in SW1990 (A) and PANC-1 (B) cells transfected with their corresponding inhibitor or negative control (NC). (C) ARHGAP4 mRNA levels in SW1990 and PANC-1 cells transfected with miR-3150a-3p, miR-939-5p, or miR-762 inhibitor or NC. (D) The luciferase activity was measured by the Dual-Luciferase Reporter Assay in SW1990 and PANC-1 cells. ****P*<0.001 compared with NC.


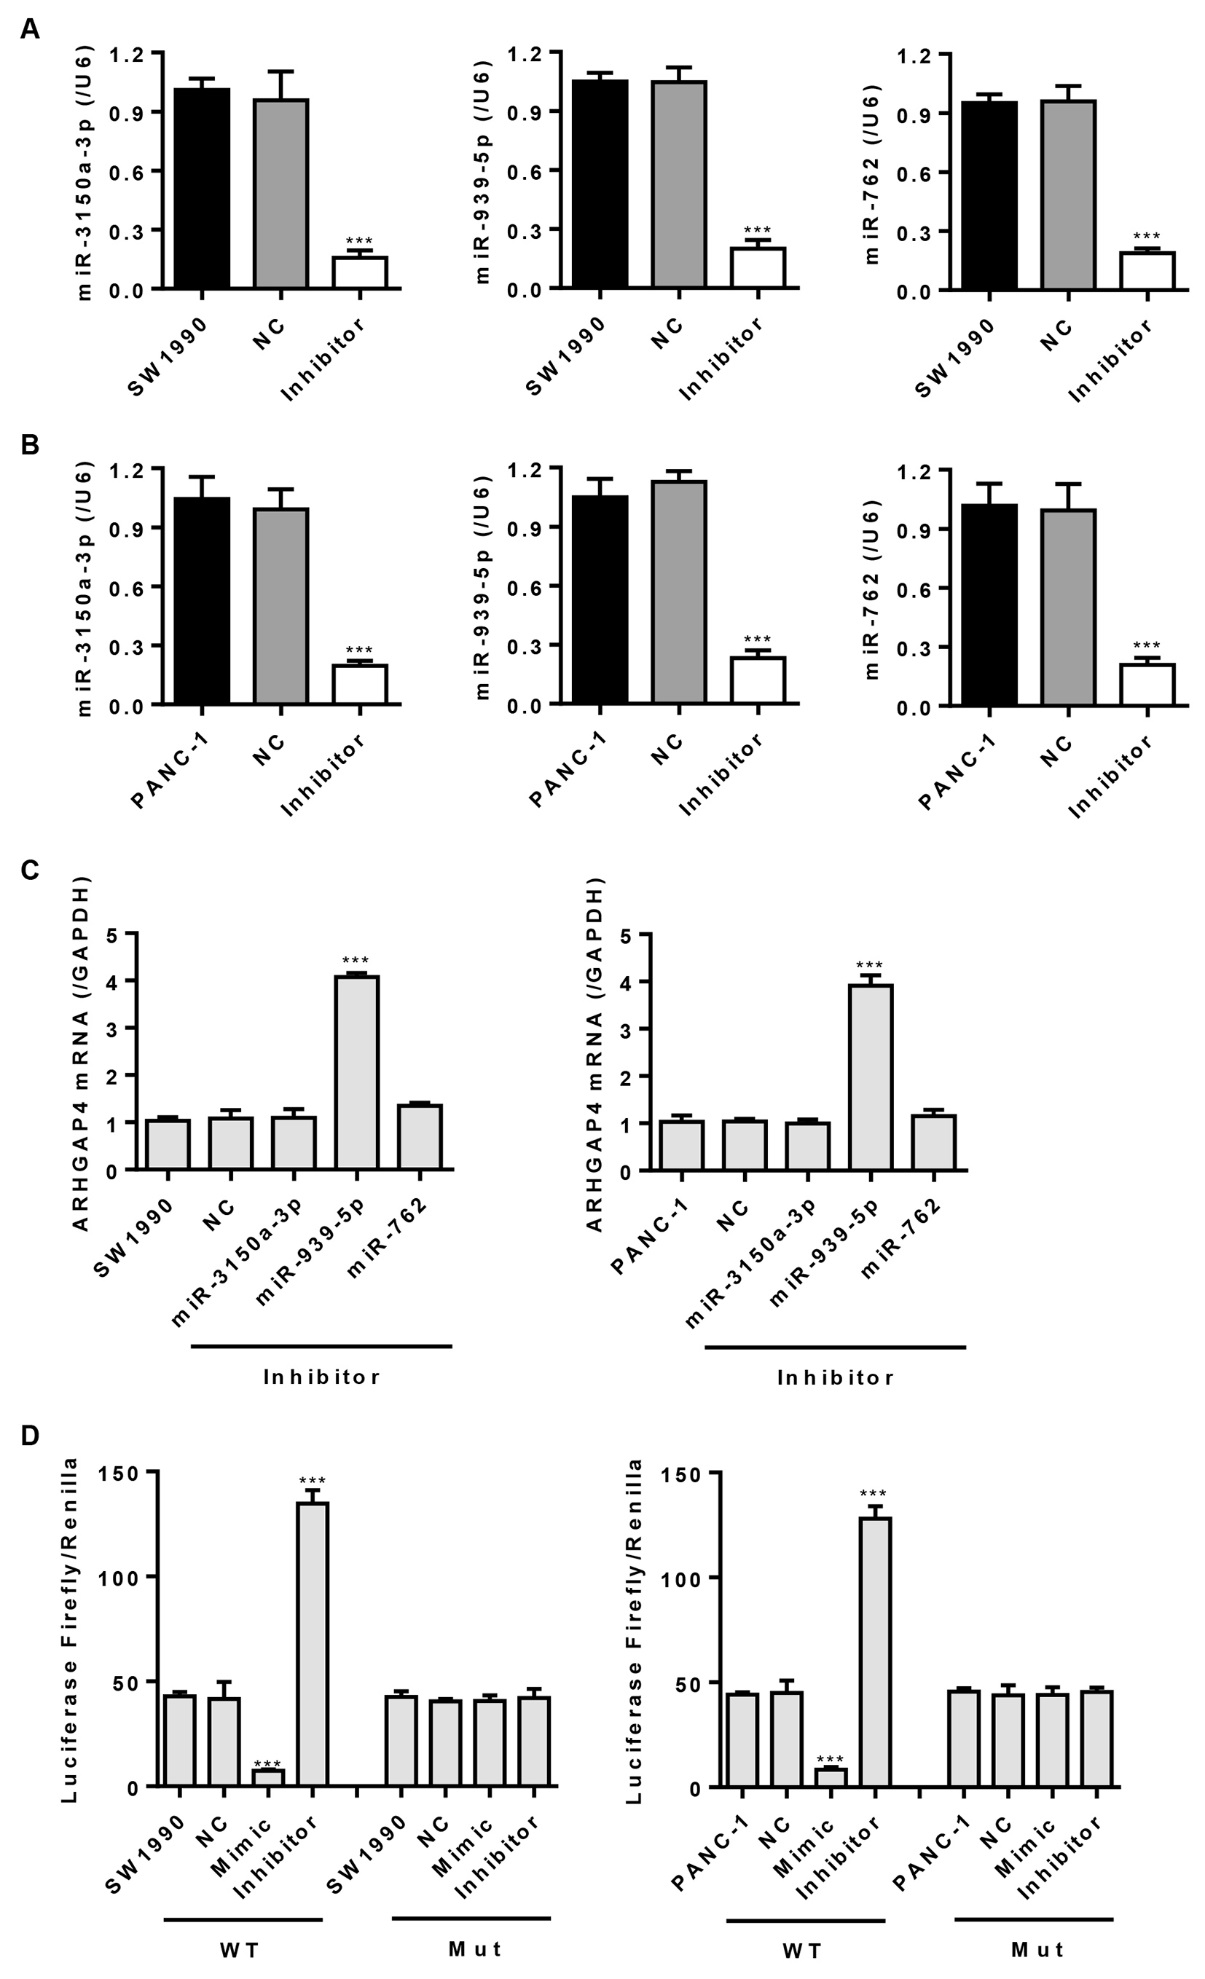

Supplement: Supplementary file 1 [file get_supplementary_file.php]
